# Supplementary material for: Monoclonal Antibodies Against Mature Interleukin-18 Ameliorate Colitis and Repair Goblet Cell Function
Source: PubMed Central journal article supplement — Dig Dis Sci. 2024 May 7;69(7):2573–85. doi: 10.1007/s10620-024-08453-2 (PMC11258180; doi:10.1007/s10620-024-08453-2), 2024-05-07
Supplement: 10620_2024_8453_MOESM1_ESM.pdf [file 10620_2024_8453_MOESM1_ESM.pdf]

# Monoclonal Antibodies Against Mature Interleukin-18 Ameliorate Colitis and Repair Goblet Cell Function

## Supplementary Information

Jingxi Mu, MD, <sup>a</sup>, Keiko Maeda, MD, PhD, <sup>a\*</sup>, Ayako Ohashi, MD, PhD, <sup>a</sup>, Takeshi

Urano, MD, PhD, <sup>b,c,d</sup>, Yuko Nariai, PhD, <sup>d</sup>, Hiroki Kamino, PhD, <sup>d</sup>, Masanao

Nakamura, MD, PhD, <sup>e</sup>, Takeshi Yamamura, MD, PhD, <sup>a</sup>, Tsunaki Sawada, MD, PhD, <sup>e</sup>,

Eri Ishikawa, MD, PhD, <sup>a</sup>, Kentaro Murate, MD, PhD, <sup>a</sup>, Kenta Yamamoto, MD, PhD,

<sup>e</sup>, Takashi Hirose, MD, PhD, <sup>a</sup>, Kazuhiro Furukawa, MD, PhD, <sup>a</sup> Mitsuhiro Fujishiro,

MD, PhD, <sup>f</sup>, Hiroki Kawashima, MD, PhD, <sup>a</sup>

<sup>a</sup>Department of Gastroenterology and Hepatology, Nagoya University Graduate School of Medicine, 65 Tsurumai-cho, Showa-ku, Nagoya 466-8550, Japan

<sup>b</sup>Department of Biochemistry, Shimane University School of Medicine, Izumo 693-8501, Japan

<sup>c</sup>mAbProtein Co. Ltd., Izumo 693-8501, Japan

<sup>d</sup>Center for Vaccines and Therapeutic Antibodies for Emerging Infectious Diseases, Shimane University, Izumo, Japan

<sup>e</sup>Department of Endoscopy, Nagoya University Graduate School of Medicine, 65 Tsurumai-cho, Showa-ku, Nagoya 466-8550, Japan

<sup>f</sup>Department of Gastroenterology, Graduate School of Medicine, The University of Tokyo, 7-3-1, Hongo, Bunkyo-ku, Tokyo, 113-8655, Japan

**\*Corresponding author**

Keiko Maeda, Email address: [kmaeda@med.nagoya-u.ac.jp](mailto:kmaeda@med.nagoya-u.ac.jp)

Department of Gastroenterology and Hepatology, Nagoya University Graduate School of  
Medicine, 65 Tsurumai-cho, Showa-ku, Nagoya 466-8550, Japan.

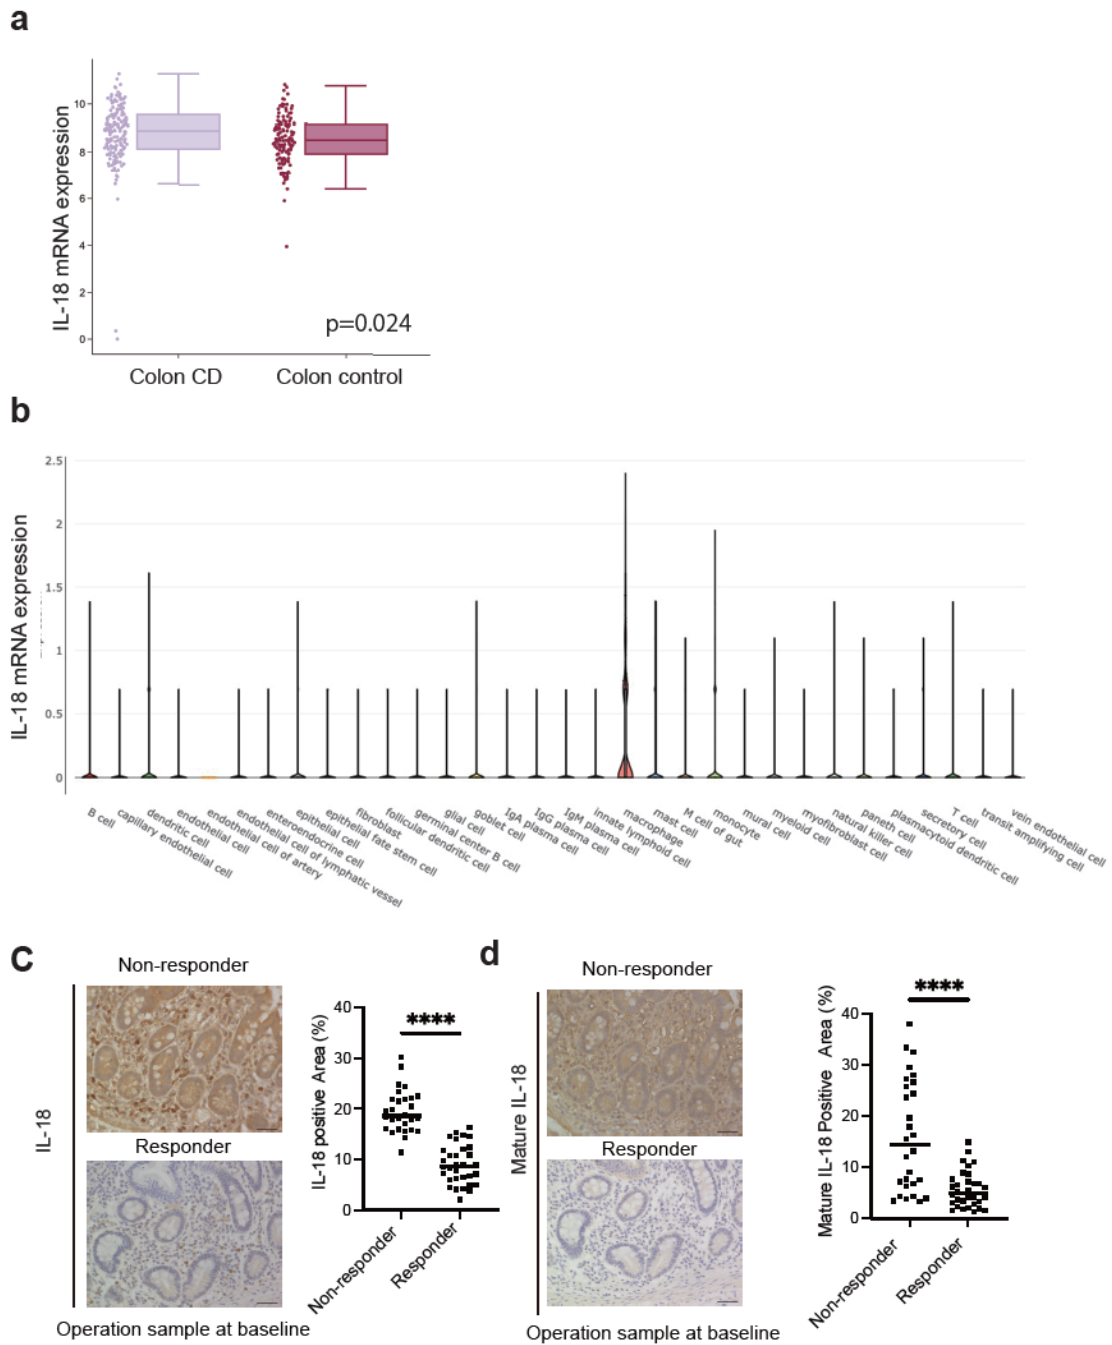

**Supplementary Figure 1**

**Supplementary Figure 1: IL-18 and mature IL-18 expression is upregulated in patients with CD.**

(a) IL-18 expression in patients with CD using bulk RNA-seq database IBD

Transcriptome and Metatranscriptome Meta-Analysis, IBD TaMMA; <https://ibd-meta-analysis.herokuapp.com>). (b) Cell type expressing IL-18 using scRNA-seq databases derived from the Single Cell Portal (SCP1423, [https://singlecell.broadinstitute.org/single\\_cell](https://singlecell.broadinstitute.org/single_cell)). (c) Anti-IL-18 mAb (11-4.1) recognition of precursor and mature IL-18 in surgical samples and quantification of IL-18-positive areas. (d) Immunohistochemistry with anti-IL-18 mAb (9-10.2) showing mature IL-18 in surgical samples and quantification of the mature IL-18-positive areas. Non-responder n=14, responder n=17, Scale bar: 40  $\mu$ m. Data are presented as the means  $\pm$  SD. Statistical comparisons were performed using an unpaired *t*-test. \**P* < 0.05, \*\**P* < 0.01, \*\*\**P* < 0.001, \*\*\*\**P* < 0.0001.

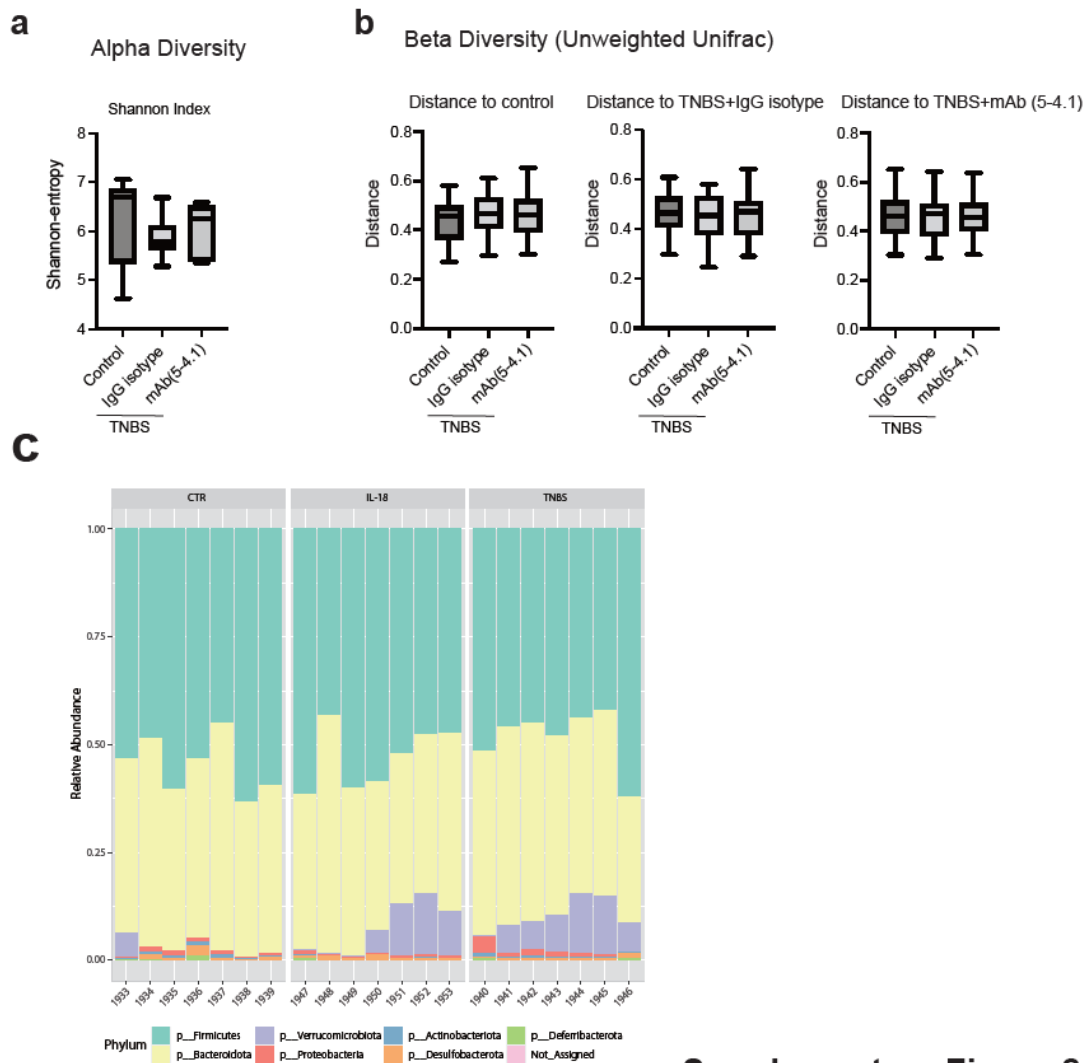

Supplementary Figure 2

**Supplementary Figure 2: Gut microbiota analysis after administration of anti-IL-18 mAb (5-4.1).**

(a and b) Comparison of alpha-diversity and  $\beta$ -diversity at day 5 after TNBS administration. (c) Comparison of the intestinal microbiota at the phylum level,  $n=7$  for each group. Data are presented as the means;  $*P < 0.05$  by one-way ANOVA, followed by Tukey's post-hoc test.
